# Supplementary material for: Susceptibility for Lupus Nephritis by Low Copy Number of theFCGR3BGene Is Linked to Increased Levels of Pathogenic Autoantibodies
Source: Hindawi journal article supplement (doi:10.1155/2013/750814), 2013-01-01
Supplement: f1 [file 750814.f1.pdf]

**S. Table 1** SLEDAI (data collection sheet)

| <b>SLEDAI</b>                                                                                                        |               |                        |                                                                                                                                                                                                                                                                                                                                                                                                        |
|----------------------------------------------------------------------------------------------------------------------|---------------|------------------------|--------------------------------------------------------------------------------------------------------------------------------------------------------------------------------------------------------------------------------------------------------------------------------------------------------------------------------------------------------------------------------------------------------|
| (Enter weight in SLEDAI. Score column if descriptor is present at the time of the visit or in the preceding 10 days) |               |                        |                                                                                                                                                                                                                                                                                                                                                                                                        |
| Study No.:                                                                                                           | Patient name: | Visit date:            |                                                                                                                                                                                                                                                                                                                                                                                                        |
|                                                                                                                      |               | day                    | month year                                                                                                                                                                                                                                                                                                                                                                                             |
| Weight                                                                                                               | SCORE         | Descriptor             | Definition                                                                                                                                                                                                                                                                                                                                                                                             |
| 8                                                                                                                    | _____         | Seizure                | Recent onset, exclude metabolic, infectious, or drug causes.                                                                                                                                                                                                                                                                                                                                           |
| 8                                                                                                                    | _____         | Psychosis              | Altered ability to function in normal activity due to severe disturbance in the perception of reality. Include hallucinations, incoherence, marked illogical thinking, bizarre, disorganized, or catatonic behaviour. Exclude uraemia and drug causes.                                                                                                                                                 |
| 8                                                                                                                    | _____         | Organic brain syndrome | Altered mental function with impaired orientation, memory, or other intellectual function, with rapid onset and fluctuating clinical features, inability to sustain attention to environment, plus at least 2 of the following: perceptual disturbance, incoherent speech, insomnia or daytime drowsiness, or increase or decrease psychomotor activity. Exclude metabolic, infectious or drug causes. |
| 8                                                                                                                    | _____         | Visual disturbance     | Retinal changes of SLE. Include cytoid bodies, retinal hemorrhages, serous exudates or hemorrhages in the choroid, or optic neuritis. Exclude hypertension, infection, or drug causes                                                                                                                                                                                                                  |
| 8                                                                                                                    | _____         | Cranial nerve disorder | New onset of sensory or motor neuropathy involving cranial nerves.                                                                                                                                                                                                                                                                                                                                     |
| 8                                                                                                                    | _____         | Lupus headache         | Severe, persistent headache; may be migrainous, but must be nonresponsive to narcotic analgesia.                                                                                                                                                                                                                                                                                                       |
| 8                                                                                                                    | _____         | CVA                    | New onset of cerebrovascular accident(s). Exclude arteriosclerosis.                                                                                                                                                                                                                                                                                                                                    |
| 8                                                                                                                    | _____         | Vasculitis             | Ulceration, gangrene, tender finger nodules, periungual infarction, splinter hemorrhages, or biopsy or angiogram proof of vasculitis.                                                                                                                                                                                                                                                                  |
| 4                                                                                                                    | _____         | Arthritis              | ≥ 2 joints with pain and signs of inflammation (i.e., tenderness, swelling or effusion).                                                                                                                                                                                                                                                                                                               |
| 4                                                                                                                    | _____         | Myositis               | Proximal muscle aching/weakness, associated with elevated creatine phosphokinase/aldolase or electromyogram changes or a biopsy showing myositis.                                                                                                                                                                                                                                                      |
| 4                                                                                                                    | _____         | Urinary casts          | Heme-granular or red blood cell casts.                                                                                                                                                                                                                                                                                                                                                                 |
| 4                                                                                                                    | _____         | Hematuria              | > 5 red blood cells/high power field. Exclude stone, infection or other cause.                                                                                                                                                                                                                                                                                                                         |
| 4                                                                                                                    | _____         | Proteinuria            | >0.5 gram/24 hours                                                                                                                                                                                                                                                                                                                                                                                     |
| 4                                                                                                                    | _____         | Pyuria                 | >5 with blood cells/high power field. Exclude infection.                                                                                                                                                                                                                                                                                                                                               |
| 2                                                                                                                    | _____         | Rash                   | Inflammatory type rash.                                                                                                                                                                                                                                                                                                                                                                                |
| 2                                                                                                                    | _____         | Alopecia               | Abnormal, patchy or diffuse loss of hair.                                                                                                                                                                                                                                                                                                                                                              |
| 2                                                                                                                    | _____         | Mucosal ulcers         | Oral or nasal ulcerations.                                                                                                                                                                                                                                                                                                                                                                             |
| 2                                                                                                                    | _____         | Pleurisy               | Pleuritic chest pain with pleural rub or effusion, or pleural thickening.                                                                                                                                                                                                                                                                                                                              |
| 2                                                                                                                    | _____         | Pericarditis           | Pericardial pain with at least 1 of the following: rub, effusion, or electrocardiogram or echocardiogram confirmation.                                                                                                                                                                                                                                                                                 |
| 2                                                                                                                    | _____         | Low complement         | Decrease in CH50, C3 or C4 below the lower limit of normal for testing laboratory.                                                                                                                                                                                                                                                                                                                     |
| 2                                                                                                                    | _____         | Increased DNA binding  | Increased DNA binding by Farr assay above normal range for testing laboratory.                                                                                                                                                                                                                                                                                                                         |
| 1                                                                                                                    | _____         | Fever                  | >38° C. Exclude infectious cause.                                                                                                                                                                                                                                                                                                                                                                      |
| 1                                                                                                                    | _____         | Thrombocytopenia       | <100,000 platelets / x10 <sup>9</sup> /L, exclude drug causes.                                                                                                                                                                                                                                                                                                                                         |
| 1                                                                                                                    | _____         | Leukopenia             | <3,000 white blood cells / x10 <sup>9</sup> /L, exclude drug causes.                                                                                                                                                                                                                                                                                                                                   |
| TOTAL SCORE                                                                                                          |               | _____                  |                                                                                                                                                                                                                                                                                                                                                                                                        |

**S. Table 2** The SLICC/ACR damage index for SLE

| Item                                                                                                                                                                                         | Score |
|----------------------------------------------------------------------------------------------------------------------------------------------------------------------------------------------|-------|
| Ocular (either eye, by clinical assessment)                                                                                                                                                  |       |
| Any cataract ever                                                                                                                                                                            | 1     |
| Retinal change <i>or</i> optic atrophy                                                                                                                                                       | 1     |
| Neuropsychiatric                                                                                                                                                                             |       |
| Cognitive impairment (e.g., memory deficit, difficulty with calculation, poor concentration, difficulty in spoken or written language, impaired performance level) <i>or</i> major psychosis | 1     |
| Seizures requiring therapy for 6 months                                                                                                                                                      | 1     |
| Cerebrovascular accident ever (score 2 if > 1)                                                                                                                                               | 1 (2) |
| Cranial or peripheral neuropathy (excluding optic)                                                                                                                                           | 1     |
| Transverse myelitis                                                                                                                                                                          | 1     |
| Renal                                                                                                                                                                                        |       |
| Estimated or measured glomerular filtration rate <50%                                                                                                                                        | 1     |
| Proteinuria $\geq$ 3.5 mg/24 hours                                                                                                                                                           | 1     |
| <i>or</i>                                                                                                                                                                                    |       |
| End-stage renal disease (regardless of dialysis or transplantation)                                                                                                                          | 3     |
| Pulmonary                                                                                                                                                                                    |       |
| Pulmonary hypertension (right ventricular prominence, or loud P2)                                                                                                                            | 1     |
| Pulmonary fibrosis (physical and radiograph)                                                                                                                                                 | 1     |
| Shrinking lung (radiograph)                                                                                                                                                                  | 1     |
| Pleural fibrosis (radiograph)                                                                                                                                                                | 1     |
| Pulmonary infarction (radiograph)                                                                                                                                                            | 1     |
| Cardiovascular                                                                                                                                                                               |       |
| Angina <i>or</i> coronary artery bypass                                                                                                                                                      | 1     |
| Myocardial infarction ever (score 2 if > 1)                                                                                                                                                  | 1 (2) |
| Cardiomyopathy (ventricular dysfunction)                                                                                                                                                     | 1     |
| Valvular disease (diastolic murmur, or systolic > 3/6)                                                                                                                                       | 1     |
| Pericarditis for 6 month, <i>or</i> pericardiectomy                                                                                                                                          | 1     |
| Peripheral vascular                                                                                                                                                                          |       |
| Claudicatio for 6 months                                                                                                                                                                     | 1     |
| Minor tissue loss (pulp space)                                                                                                                                                               | 1     |
| Significant tissue loss ever (e.g., loss of digit or limb) (score 2 if > 1 site)                                                                                                             | 1 (2) |
| Venous thrombosis with swelling, ulceration, <i>or</i> venous stasis                                                                                                                         | 1     |
| Gastrointestinal                                                                                                                                                                             |       |
| Infarction or resection of bowel below duodenum, spleen, liver, or gall bladder ever, for any cause (score 2 if > 1 site)                                                                    | 1 (2) |
| Mesenteric insufficiency                                                                                                                                                                     | 1     |
| Chronic peritonitis                                                                                                                                                                          | 1     |
| Stricture <i>or</i> upper gastrointestinal tract surgery ever                                                                                                                                | 1     |
| Musculoskeletal                                                                                                                                                                              |       |
| Muscle atrophy or weakness                                                                                                                                                                   | 1     |
| Deforming or erosive arthritis (including reducible deformities, excluding avascular necrosis)                                                                                               | 1     |
| Osteoporosis with fracture or vertebral collapse (excluding avascular necrosis)                                                                                                              | 1     |
| Avascular necrosis (score 2 if > 1)                                                                                                                                                          | 1 (2) |
| Osteomyelitis                                                                                                                                                                                | 1     |
| Skin                                                                                                                                                                                         |       |
| Scarring chronic alopecia                                                                                                                                                                    | 1     |
| Extensive scarring or panniculum other than scalp and pulp space                                                                                                                             | 1     |
| Skin ulceration (excluding thrombosis) for >6 month                                                                                                                                          | 1     |
| Premature gonadal failure                                                                                                                                                                    | 1     |
| Diabetes (regardless of treatment)                                                                                                                                                           | 1     |
| Malignancy (exclude dysplasia) (score 2 if > 1 site)                                                                                                                                         | 1 (2) |

Damage (nonreversible change, not related to active inflammation) occurring since onset of lupus, ascertained by clinical assessment and present for at least 6 month unless otherwise stated. Repeat episodes must occur at least 6 month apart to score 2. The same lesion cannot be scored twice
